# Supplementary material for: Vulnerability of bridges to scour: insights from an internationalexpert elicitation workshop
Source: Copernicus journal article supplement (doi:10.5194/nhess-2016-350), 2016-11-25
Supplement: Supplementary file [file nhess-2016-350-AC1-supplement.pdf]

**Vulnerability of bridges to scour: insights from an international expert elicitation workshop**

**Rob Lamb, Willy Aspinall, Henry Odbert, and Thorsten Wagener**

**Response to Referee #1**

**GENERAL COMMENTS**

*REFeree COMMENT*

The study presented by the authors is based on a formal process of elicitation whose techniques are described in the section 4 'The role of expert elicitation'. However, they are too briefly described and do not allow the reader to fully understand the following section 5 where the results are analysed. In particular, the manuscript would benefit from a more detailed presentation of the Classical Model used to tackle the second question raised in the study. In the section 1, the methods applied to weight information in the group of experts are succinctly mentioned. As these methods were used throughout all the process of elicitation and appear in most of the results and figures, they should be mentioned in the section 4 and further detailed.

*RESPONSE*

We will add the following text to provide further explanation of the Classical Model:

For uncertainty quantification, a structured expert judgment procedure formulated by Cooke (1991), known as the "Classical Model", was adopted in this study. This approach is supported by a software package called EXCALIBUR (Cooke and Solomatine, 1992), available at [www.lighttwist.net/wp/excalibur](http://www.lighttwist.net/wp/excalibur). This is a quantitative elicitation method used to assess numerical estimates of uncertain parameters or variables, in this case scour failure probabilities conditional on various stated assumptions.

The unique feature of this approach is that distinct weights are given to individual experts, based on a statistical test of the expert's ability to judge uncertainties, determined empirically by performance metrics derived from control questions. The main steps in the procedure for applying the Classical Model in practice are:

- A group of experts is selected by a problem owner and a facilitator, and an elicitation protocol is developed; this comprises a set of multiple 'seed items' (i.e. the control) and a set of 'target questions', both drawn from within the experts' field of knowledge;
- The experts assess the set of 'seed item' quantities; experts are not expected to know the true values but should be able to capture most of them by defining informative credible ranges. Taking their responses to the set of seed items, the experts are treated as statistical hypotheses and are scored with respect to statistical likelihood ('calibration') and informativeness, using theory and procedures described by Cooke (1991);
- These scores are combined to form individual performance weights using scoring rules formulated such that experts receive maximal weight by, and only by, stating their true degrees of belief;
- The elicitation protocol includes a set of 'target item' questions; in principle, these could be subject to possible measurement or observation but, in the problem owner's case, for one

reason or another they are not amenable to such an approach; the only feasible recourse is to seek expert judgements;

- Experts are elicited individually regarding their uncertainty judgements for these target items. A weighted linear combination of their responses is calculated for each question using EXCALIBUR to provide a pooled result (known as a synthetic 'decision maker'), conditioned on the performance-weighted scores.

The latter is the key feature of this method. When it comes to attempting to resolve differences in expert judgments, searching for harmony of views by negotiation or conciliation can leave participants discomfited by the outcomes. Extensive experience (see below for references to previous case studies) overwhelmingly confirms that experts grow to favour the Classical Model approach because its performance measures are objective and amenable to diagnostic examination. The 'reward' nature of weights is very important. An expert's influence on the pooled result should not appear haphazard, and he/she should be discouraged from attempting to game the system by attempting to tilt his/her assessments to achieve a desired outcome. Thus, it is necessary to impose a formal scoring rule constraint on the weighing scheme. This means an expert achieves maximal expected weight by, and only by, stating assessments in conformity with their true scientific or technical beliefs.

In the section 3, it is stated that the first question investigated in the study was "What variables should be chosen to describe the loading conditions relevant to scour risk?". In the section 5.1 'Question (1): Vulnerability factors that should be considered in assessing risk of scour', the first question asked to the expert appeared to be "What are the most important factors that should be considered in assessing scour risk to bridges?". These three different expressions of what was the first question addressed in the study are confusing for the reader. Using the same terminology and defining which from either the loading conditions and/or vulnerability factors were screened should help to make the aim of the study clearer.

We agree, and have revised the terminology used in setting out Question 1 to be consistent.

The details of the questions asked to the experts are actually all presented in the section 5, which is the section of the results. This section is thus easy to read, each question is stated in the relevant sub-section and the results directly analysed. However, it makes the methodology and its overall objectives more difficult to understand for the reader. For instance, the question asked and presented in the section 5.2.5 about the triggers for asset inspection almost comes as a surprise, which should not be the case there. Thus, all the questions asked to the experts could be listed in one of the first sections, and their objectives made clearer.

We have added a table at the end of Section 4 summarising the questions posed to the expert group, their motivation, and where the results are presented and discussed.

**Table 1: Summary of questions posed in the elicitation workshop**

| Question                                                                                             | Motivation | Results |
|------------------------------------------------------------------------------------------------------|------------|---------|
| 1) What are the most important factors that should be considered in assessing scour risk to bridges? |            |         |

|                                                                                                      |                                                                                                                                                          |                                    |
|------------------------------------------------------------------------------------------------------|----------------------------------------------------------------------------------------------------------------------------------------------------------|------------------------------------|
| What are the most important factors that should be considered in assessing scour risk to bridges?    | To explore what variables could and should be chosen to describe the loading condition(s) relevant to scour risk assessment.                             | Section 5.1<br>Table 3<br>Figure 2 |
| What factors might be proposed to define relevant loading conditions for a scour fragility function? |                                                                                                                                                          | Section 5.1.1<br>Table 4           |
| What factors are important in determining how the risk of bridge failure may change?                 | To explore conditions that might provoke re-evaluation of scour risk, including the potential influence of climate change.                               | Section 5.1.2<br>Table 5           |
| 2) Quantitative elicitation of failure probabilities, with uncertainties                             |                                                                                                                                                          |                                    |
| Elicitation of bridge failure probabilities, with uncertainty ranges, for specified flood events     | To capture pooled expert judgements about scour failure probabilities (fragility), and the associated uncertainties, for bridges subjected to flooding.  | Section 5.2.2<br>Figure 3          |
| Elicitation of annual failure probabilities                                                          | To explore the influence of implicit or explicit assumptions about flood event frequencies on expert judgements of uncertainty about bridge scour.       | Section 5.2.3<br>Figure 4          |
| Elicitation of conditional event failure probabilities                                               | To capture expert judgements about the scour failure probabilities, and associated uncertainties, for bridges subjected to a sequence of flood events.   | Section 5.2.4<br>Figure 5          |
| Elicitation of triggers for asset inspection                                                         | To capture expert judgements about the severity (in terms of relative frequency) of a flood event that should trigger a precautionary bridge inspection. | Section 5.2.5<br>Table 6           |

The manuscript could be improved in providing a clearer, more structured and outlined, description of the methodology.

We hope that the fuller description of the Classical Model (see above) provides the required clarity within the existing structure setting out:

(A) the combination of two elicitation approaches (paired comparison implemented with the UNIBALANCE method, followed by the Classical Model pooled elicitation of uncertainties), and,

(B) the steps taken to implement the Classical Model method.

It would help to highlight the fact that the process of elicitation undertaken by the group of international experts is formal and objective, which is a strength of the study.

We thank the reviewer for suggesting further emphasis of this point, which we agree is an important feature of the study.

We previously stated in Section 4 that the method we adopted is “formalised” and “designed to tie results into stated and transparent methodological rules, with the goal of treating expert judgements in the same way as other scientific data in a formal decision process”.

We have further emphasised in the new methodology text that experts have favoured the Classical Model because its “performance measures are objective and amenable to diagnostic examination”, and discussed how those performance measures are derived from a set of control (seed) questions.

Potentially, the section 4 could be renamed ‘Methodology’ and adapted accordingly.

Section 4 has been re-titled “Expert elicitation methodology”.

The number of experts who contributed to the workshop is not provided in the manuscript. It could be relevant as statistical methods are applied to infer global results from their answers.

We stated the number of experts on line 2 of the main text, along with their nationalities and the sectors they represented. We have added further detail to this description and corrected a typo error in the original number count.

It is highly appreciated that the authors mentioned and reported the discussions that took place during and after the elicitation process. As written in the first few lines of the manuscript, with this study the ultimate goal of the authors is to “inform the development of fragility functions that may be applied within a broad scale risk modelling framework”. From the conclusion, it is not clear how in practice the results from the elicitation workshop could be used in order to achieve this goal, or what future work would be required.

It was not our aim to develop a new fragility model or protocol for industry application. However, we believe that the present study could help to guide and motivate the choice of loading variables and the structure of fragility functions. Furthermore, by capturing experts’ judgements about (very uncertain) failure probabilities, we have created an evidence base that may be compared with such functions in future as part of an informed assessment of uncertainty.

We have added text to this effect in the conclusions (Section 6).

From page 8, line 29, to page 9, line 2: In this paragraph, the intensity indicators flood flow, flood velocity and flood return period are compared, but, the outcome of this comparison is difficult to understand. Besides, I’m curious about the ability of the eliciting method used in the study to deal with dependent or “intrinsically linked” factors, such as these three factors.

We have amended the text slightly with the aim of clarifying that the flood return period is being interpreted as a probabilistic definition of the load event.

The physical correlation in question relates to the inference of factor rankings, and we note that the three variables (flow, velocity and return period) were ranked 2<sup>nd</sup>, 3<sup>rd</sup> and 4<sup>th</sup> in the group’s pooled scoring, which appears to be consistent with them being recognised by the experts as physically correlated.



## **TECHNICAL CORRECTIONS**

Page 3, line 28: Replace “sour” with “scour”

Corrected

Page 5, line 9: Aren’t there any references available for the hazard-vulnerability-loss concepts?

Added reference to K Mitchell-Wallace, M Jones, J Hillier & M Foote (eds), 2017, Natural Catastrophe Risk Management and Modelling: A Practitioner's Guide. Wiley-Blackwell, 536 pp. 218-229.

Page 6, line 2: Replace “form” with “from”

Corrected

Page 6, lines 7-8: Replace “(see, for example Decò and Frangopol 2011)” with “(see, for example, Decò and Frangopol, 2011)”

Corrected

From page 8, line 29, to page 9, line 2: In this paragraph, the intensity indicators flood flow, flood velocity and flood return period are compared, but, the outcome of this comparison is difficult to understand. Besides, I’m curious about the ability of the eliciting method used in the study to deal with dependent or “intrinsically linked” factors, such as these three factors.

See response given earlier.

Page 10, line 3: Replace “to have to in mind” with “to have to bear in mind”?

The intended wording was “to have in mind”. Corrected.

Page 11, line 13: Aren’t the lower uncertainty bounds that vary largely?

Both upper and lower bounds vary. However, the differences in upper bounds are larger (bearing in mind the log scale of the probability axis). We have added a note to the text to highlight comparison of top left and bottom left panels in Fig. 3, noting the logarithmic scale.

Page 12, paragraph from line 4 to line 10: The last sentence of this paragraph is hard to understand.

We have revised this text as follows to clarify the point being made:

A discussion was held about whether the annual failure probability is in fact determined completely by design standards (i.e. the as-built performance of the bridge matches the desired design standard perfectly), effectively removing uncertainty about bridge vulnerability. This view would appear to

imply a standard of asset maintenance and that may be unachievable in practice and seems to be counter to the wide uncertainties about vulnerability to scour that emerged from the expert group elicitation. Empirically, historical evidence from the UK railway network shows that bridge failures have occurred under a wide range of flood conditions (van Leuwen and Lamb, 2014), suggesting that it is not appropriate to treat vulnerability deterministically.

Page 12, line 28: “flood rarity” could be replaced with “flood severity” for more consistent use of the terminology. If so, it could also be replaced in the title of the Figures 3 and 5.

We thank the reviewer for pointing this inconsistency out. We have changed the main text to read “...an inspection trigger based on a probabilistic measure of flood severity...” and revised the figure captions as suggested.

From page 12, line 25, to page 13, line 4: Flood frequencies are expressed under the forms of probability, 1-in-XX AEP, return period and 1/XX AEP. Although they are all equivalent, for the reader it would be more comfortable to get all the flood frequencies detailed in this paragraph under the same form, such as the return period as shown in Table 5.

We have made the suggested changes.

Author contribution and Acknowledgements: The full name of the authors should be written instead of their initials.

We have made the suggested changes.

Figure 2: The font size of the labels is rather small and should be increased. Although the ellipses represent a nice graphical way to represent the 95% confidence bounds of the elicited parameters, I’m afraid that there are too many parameters plotted. The ellipses of only a few of them are visible, and not so clearly.

We have revised the plot to increase the font size of the labels.

We agree that the ellipses obscure each other. In fact, this is an important feature of the results, which merely show the situation as it is: there is a wide uncertainty enveloping many of factors. If the relative importance of the factors were known without uncertainty then there would not be a need to call upon expert judgment. Hence the overlap between ellipses reflects the motivation for the study.

Despite this, the factors at each end of the ranking scale are visibly separated. The message the plot conveys from the elicitation is that the expert group produced a collective ranking order from a range of disparate individual views, with diversity of those views being captured by the ellipses.

The numerical values underlying the plot are reported in Table 3. We have added a note to say this in the figure caption.

Figure 3: The graphical legend in the top left frame is definitely too small. Instead, the description of the values represented in the figure should be incorporated directly as text in the legend.

We have made the suggested change.
